# Supplementary material for: Ammonia emission estimates using CrIS satellite observations over Europe
Source: Copernicus journal article supplement (doi:10.5194/acp-24-10583-2024), 2024-09-23
Supplement: Supplementary file 1 [file acp-24-10583-2024-supplement.pdf]

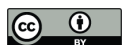

*Supplement of*

## **Ammonia emission estimates using CrIS satellite observations over Europe**

**Jieying Ding et al.**

*Correspondence to:* Jieying Ding ([jieying.ding@knmi.nl](mailto:jieying.ding@knmi.nl))

The copyright of individual parts of the supplement might differ from the article licence.

1 **SUPPLEMENTARY INFORMATION**

2

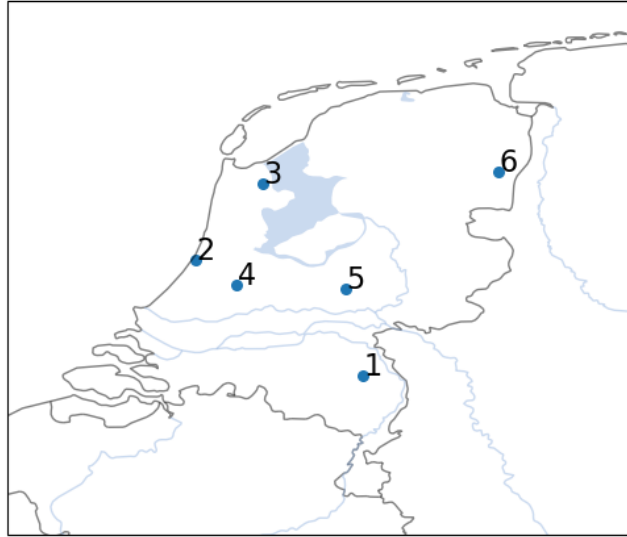

3

4 *Figure S1. NH<sub>3</sub> measurement locations of the LML network. 1. Vredepeel-Vredeweg. 2. De Zilk-Vogelaarsdreef. 3.*  
5 *Wieringerwerf-Medemblikerweg. 4. Zegveld-Oude Meije. 5. Wekerom-Riemterdijk. 6. Valthermond-Noorderdiep*

6

7

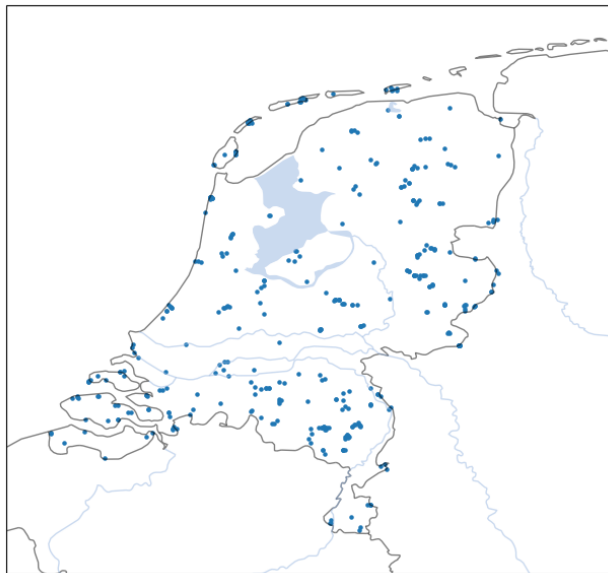

8

9

*Figure S2. NH<sub>3</sub> measurement locations of the MAN network*

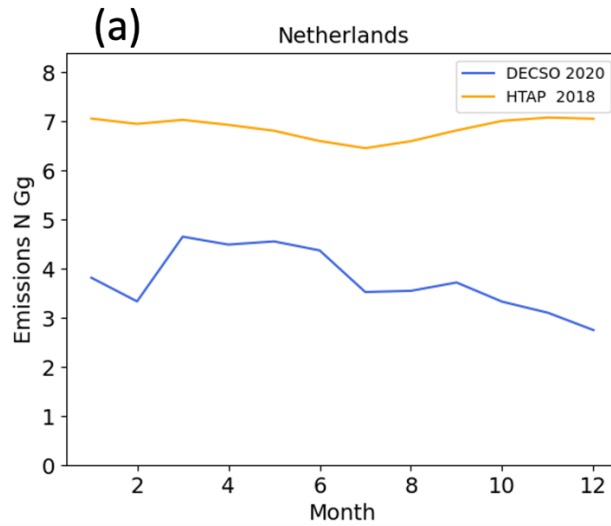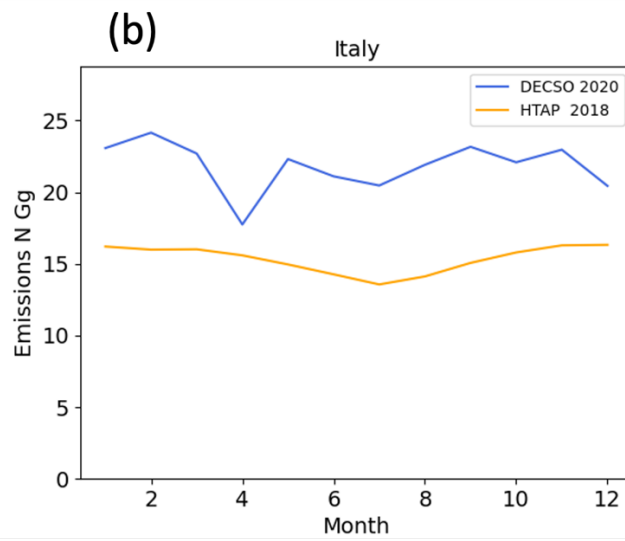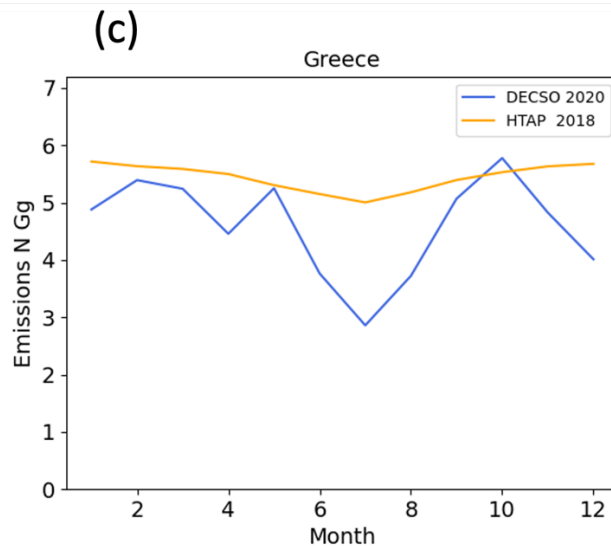

10  
11

Figure S3 Monthly NOx emissions of HTAP and DECSO in the Netherlands (a), Italy (b) and Greece (c).

12

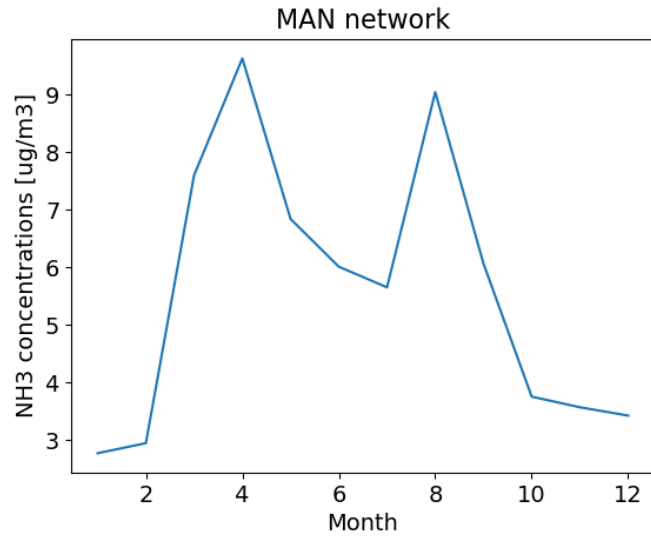

13  
14 Figure S4. Averaged monthly NH<sub>3</sub> surface concentration measured by the MAN network in 2020.

15

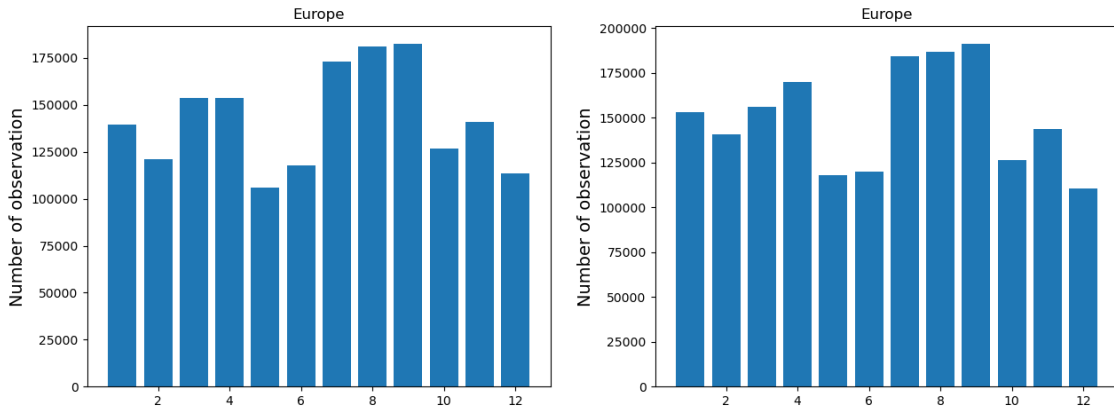

16  
17 Figure S5. The amount of observations from CrIS on SNPP (left) and NOAA20 (right) used for deriving emissions per  
18 month in 2020.

19

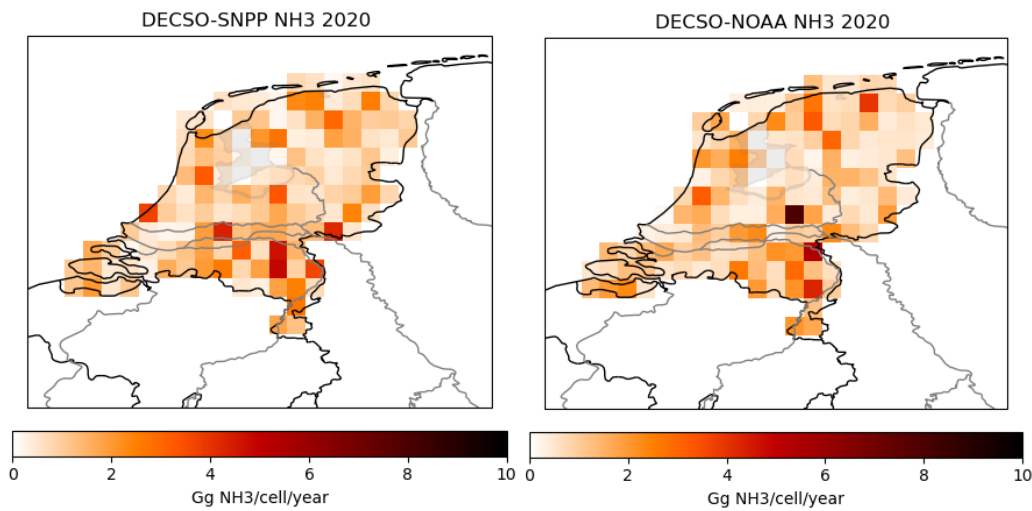

20  
21  
22 Figure S6. The NH<sub>3</sub> emissions derived from CrIS on SNPP (left) and NOAA20 (right) over The Netherlands.

23

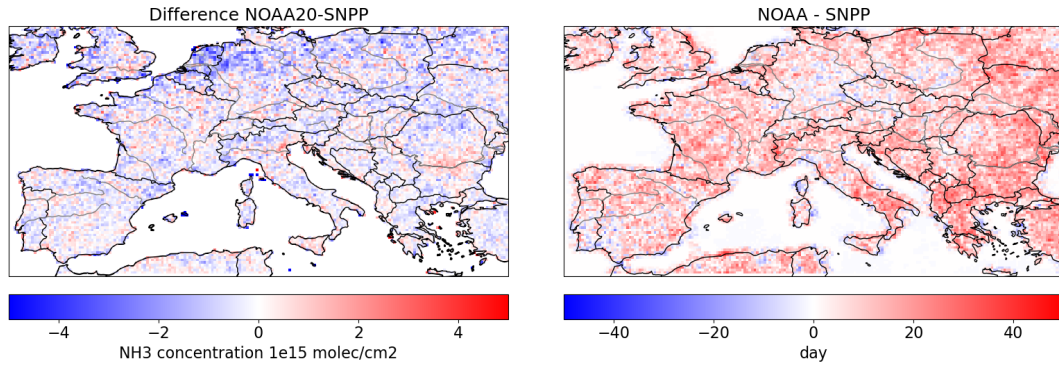

24

25 *Figure S7. The difference of yearly averaged  $\text{NH}_3$  column concentrations (left) measured by CrIS on NOAA20 and*  
26 *SNPP. The difference of days having observations per grid cell in 2020 (Right).*

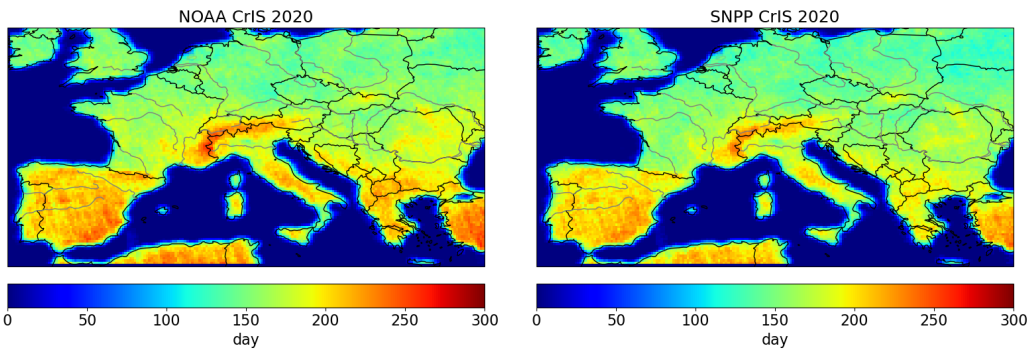

27

28 *Figure S8. Number of days having observations from CrIS on NOAA20 (left) and SNPP (right) per grid cell in 2020.*

29

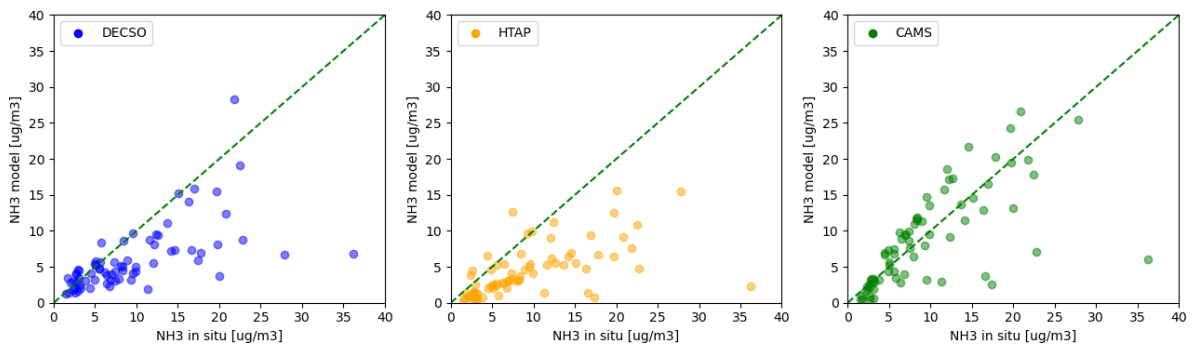

30

31 *Figure S9 Scatter plots of observations from the LML network with  $\text{NH}_3$  surface concentrations from model*  
32 *simulations with  $\text{NH}_3$  emissions from DECSO (left column), HTAP (middle column) and CAMS-GLOB-ANT (right*  
33 *column).*

34

35

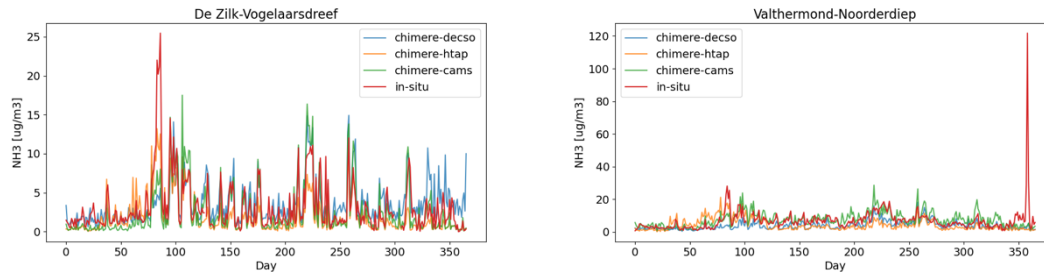

36

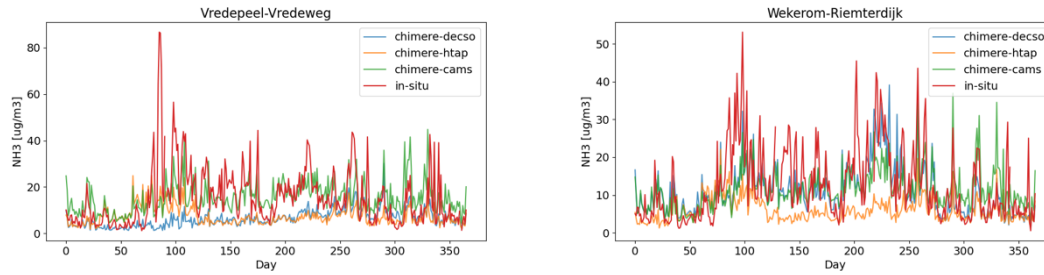

37

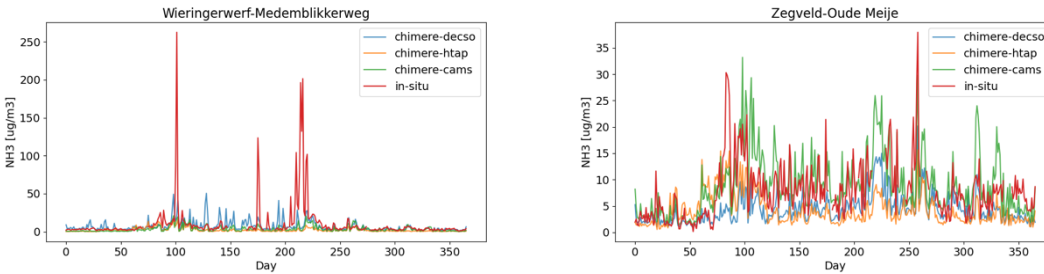

38 Figure S10. Time series of  $\text{NH}_3$  surface concentrations of in-situ measurement and model simulations with DECSO,  
 39 HTAP, CAMS-GLOB-ANT emissions at the 6 measurement locations of the LML network. The locations with their  
 40 names are referred to Figure S1.

41

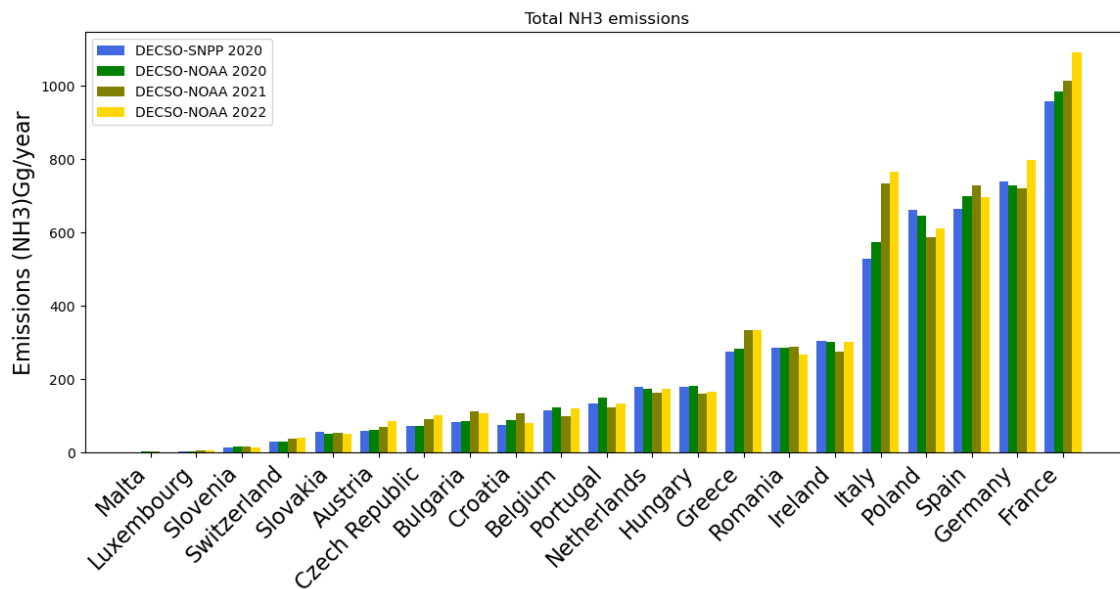

42 Figure S11. Country totals of  $\text{NH}_3$  emissions (Gg/year) derived from DECSO calculations from SNPP in 2020 and  
 43 NOAA-20 in 2020, 2021 and 2022.  
 44  
 45

46 *Table S1. The correlation coefficients and the bias of monthly mean simulated NH<sub>3</sub> surface concentrations using*  
47 *DECSO, HTAP and CAMS-GLOB-ANT NH<sub>3</sub> emissions against observations of the LML network according to Figure S9.*

|               | Correlation coefficient | Bias (µg/m <sup>3</sup> ) | RMSE (µg/m <sup>3</sup> ) |
|---------------|-------------------------|---------------------------|---------------------------|
| DECSO         | 0.63                    | -3.5                      | 6.4                       |
| HTAP v3       | 0.58                    | -5.0                      | 7.6                       |
| CAMS-GLOB-ANT | 0.68                    | -0.69                     | 5.5                       |

48

49
